# Supplementary material
Source: PubMed Central journal article supplement (PMC6239930)

# Supplementary Figure 1

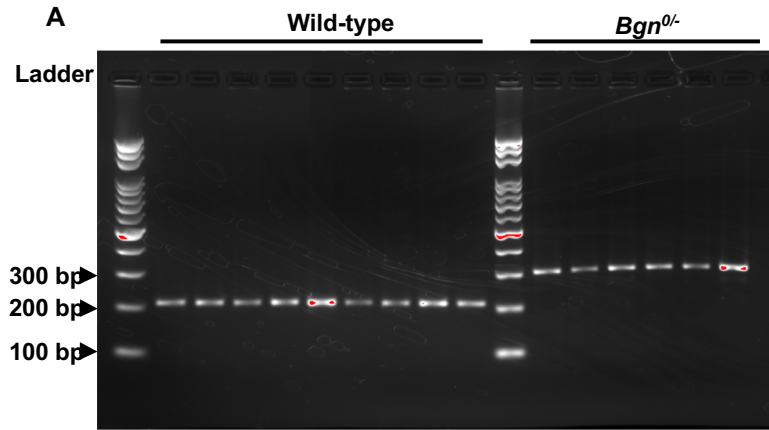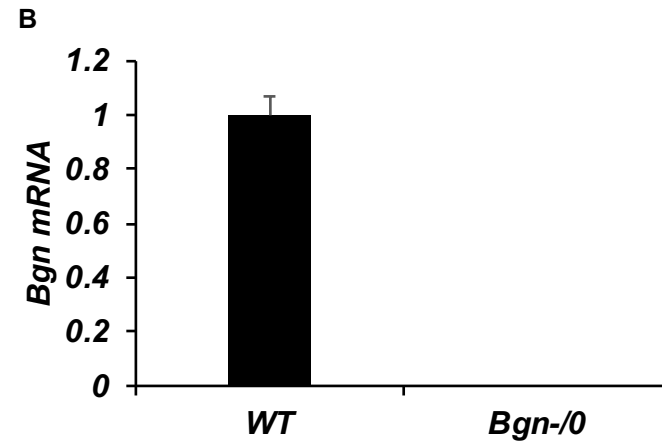

Supplement: NIHMS992548-supplement-Supplementary_Figure_1.pdf [file NIHMS992548-supplement-Supplementary_Figure_1.pdf]
